# Supplementary material for: A smart multifunctional drug delivery nanoplatform for targeting cancer cells
Source: Royal Society of Chemistry journal article supplement (doi:10.1039/c6nr02228f), 2016-01-01
Supplement: c6nr02228f2.pdf [file c6nr02228f2.pdf]

## Supplementary Information

### Smart multifunctional drug delivery nanoplatform for targeting cancer cells

M. Hoop,<sup>a</sup> F. Mushtaq,<sup>a</sup> C. Hurter,<sup>a</sup> X.-Z. Chen,<sup>\*a</sup> B. J. Nelson,<sup>a</sup> and  
S. Pané<sup>\*a</sup>

<sup>a</sup> Institute of Robotics and Intelligent Systems (IRIS), ETH Zurich, Tannenstrasse 3, CH-8092 Zurich, Switzerland.

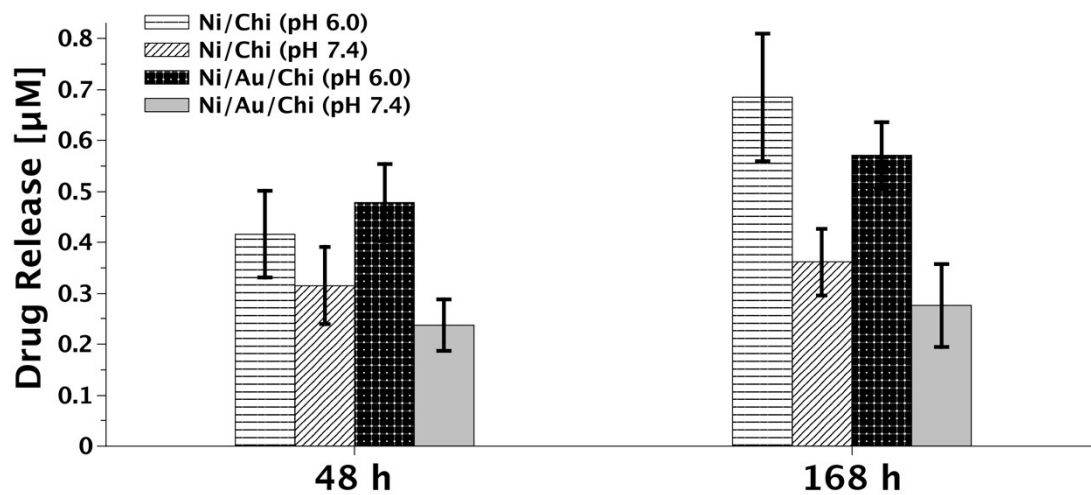

Figure S1. Drug release profile comparison of Ni/Au/Chi and Ni/Chi tubes at physiological (pH = 7.4) and pathological (pH = 6.0) conditions.

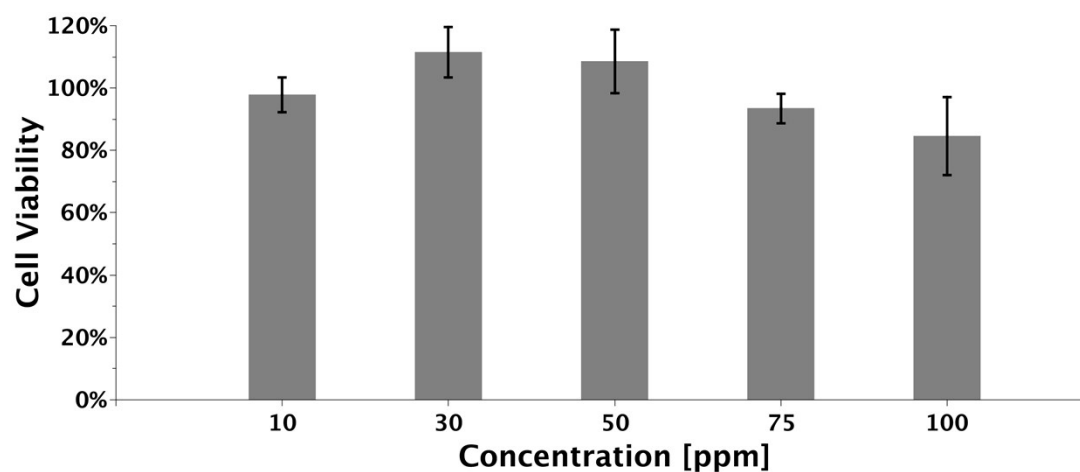

Figure S2. MTT assay of macrophages incubated with Ni/Au/Chi nanotubes at different concentrations. The cell viability percentages are calculated relative to the control experiment without nanotubes.
